# Supplementary material for: The two-Cys-type TetR repressor GbaA confers resistance under disulfide and electrophile stress in Staphylococcus aureus
Source: PubMed Central journal article supplement — Free Radic Biol Med. 2021 Dec;177:120–31. doi: 10.1016/j.freeradbiomed.2021.10.024 (PMC8693949; doi:10.1016/j.freeradbiomed.2021.10.024), 2021-12
Supplement: mmc1.pdf [file mmc1.pdf]

**Table S1. Bacterial strains and plasmids**

| Strains and plasmids                                | Description                                                                                                                                                         | Reference  |
|-----------------------------------------------------|---------------------------------------------------------------------------------------------------------------------------------------------------------------------|------------|
| <i>Escherichia coli</i>                             |                                                                                                                                                                     |            |
| DH5 $\alpha$                                        | F- $\phi$ 80lacZ $\Delta$ (lacZYA-argF) U169<br>deoRsupE44 $\Delta$ lacU169 (f80lacZDM15) hsdR17 recA1<br>endA1 (rk- mk+) supE44gyrA96 thi-1 gyrA69 relA1           | (7)        |
| BL21(DE3) <i>plysS</i>                              | F- ompT hsdS gal (rb- mb+) DE3(Sam7 $\Delta$ nin5 lacUV5-<br>T7 Gen1)                                                                                               | (7)        |
| BL21(DE3) <i>plysS</i> pET11b- <i>gbaA</i>          | For overexpression of His-tagged GbaA                                                                                                                               | This study |
| BL21(DE3) <i>plysS</i> pET11b-<br><i>gbaAC55S</i>   | For overexpression of His-tagged GbaAC55S                                                                                                                           | This study |
| BL21(DE3) <i>plysS</i> pET11b-<br><i>gbaAC104S</i>  | For overexpression of His-tagged GbaAC104S                                                                                                                          | This study |
| <i>Staphylococcus aureus</i>                        |                                                                                                                                                                     |            |
| RN4220                                              | restriction negative strain/MSSA cloning intermediate<br>derived from 8325-4                                                                                        | (3)        |
| COL                                                 | Archaic HA-MRSA strain                                                                                                                                              | (6)        |
| COL- $\Delta$ <i>gbaA</i>                           | COL <i>gbaA</i> deletion mutant                                                                                                                                     | This study |
| COL- $\Delta$ <i>gbaB</i>                           | COL <i>gbaB</i> deletion mutant                                                                                                                                     | This study |
| COL- $\Delta$ <i>gbaA</i> -pRB473- <i>gbaA</i>      |                                                                                                                                                                     | This study |
| COL- $\Delta$ <i>gbaA</i> -pRB473- <i>gbaAC55S</i>  |                                                                                                                                                                     | This study |
| COL- $\Delta$ <i>gbaA</i> -pRB473- <i>gbaAC104S</i> |                                                                                                                                                                     | This study |
| COL- $\Delta$ <i>gbaB</i> -pRB473- <i>gbaB</i>      |                                                                                                                                                                     | This study |
| COL- $\Delta$ SACOL2590-92                          | COL SACOL2590-92 deletion mutant                                                                                                                                    | This study |
| <i>Staphylococcus</i> phage 81                      |                                                                                                                                                                     |            |
| pET11b                                              | <i>E. coli</i> expression plasmid                                                                                                                                   | Novagen    |
| pRB473                                              | pRB373-derivative, <i>E. coli</i> / <i>S. aureus</i> shuttle vector,<br>Amp <sup>r</sup> , Cm <sup>r</sup>                                                          | (1)        |
| pRB473-XylR                                         | pRB373-derivative, <i>E. coli</i> / <i>S. aureus</i> shuttle vector,<br>containing xylose-inducible P <sub>Xyl</sub> promoter<br>Amp <sup>r</sup> , Cm <sup>r</sup> | (4)        |
| pET11b- <i>gbaA</i>                                 | pET11b-derivative for overexpression of His-tagged<br>GbaA                                                                                                          | This study |
| pET11b- <i>gbaAC55S</i>                             | pET11b-derivative for overexpression of His-tagged<br>GbaAC55S                                                                                                      | This study |
| pET11b- <i>gbaAC104S</i>                            | pET11b-derivative for overexpression of His-tagged<br>GbaAC104S                                                                                                     | This study |
| pMAD- <i>gbaA</i> deletion                          | pMAD with up- and downstream region of <i>gbaA</i>                                                                                                                  | This study |
| pMAD- <i>gbaB</i> deletion                          | pMAD up- and downstream region of <i>gbaB</i>                                                                                                                       | This study |
| pMAD-SACOL2590-92 deletion                          | pMAD with upstream region of SACOL2592 and<br>downstream region of SACOL2590                                                                                        | This study |
| pRB473-XylR- <i>gbaA</i>                            | pRB473-derivative expressing <i>gbaA-His</i> under P <sub>Xyl</sub>                                                                                                 | This study |
| pRB473-XylR- <i>gbaAC55S</i>                        | pRB473-derivative expressing <i>gbaAC55S-His</i> under<br>P <sub>Xyl</sub>                                                                                          | This study |
| pRB473-XylR- <i>gbaAC104S</i>                       | pRB473-derivative expressing <i>gbaAC104S-His</i> under<br>P <sub>Xyl</sub>                                                                                         | This study |
| pRB473-XylR- <i>gbaB</i>                            | pRB473-derivative expressing <i>gbaB</i> under P <sub>Xyl</sub>                                                                                                     | This study |

**Table S2. Oligonucleotide primers**

| Primer name                 | Sequence (5' to 3')                                   |
|-----------------------------|-------------------------------------------------------|
| pET-gbaA-for-NheI           | CTAGCTAGCATGCGAAAAGATGCAAAAGAGA                       |
| pET-gbaA-rev-BamHI          | CGCGGATCCTTAGTGATGGTGATGGTGATG-GTCATTACGTCCCACCTCAT   |
| gbaAC55S-for                | GATAAAAGCGATTTAT <b>CT</b> TACTACGTCATACAA            |
| gbaAC55S-rev                | TTGTATGACGTAGTA <b>AG</b> ATAAATCGCTTTTATC            |
| gbaAC104S-for               | AAGGCACTACTGCAAT <b>CT</b> TATTGAAGCAGGCAAC           |
| gbaAC104S-rev               | GTTGCCTGCTTCAAT <b>AG</b> ATTGCAGTAGTGCCTT            |
| pMAD-gbaA-for-BglII         | CGCAGATCTAACTGCATTACCTTGCTTCC                         |
| pMAD-gbaA-f1-rev            | TAATTTCTGTACGCTTCAATTGTGCATCTTTTCGCATGATTACA          |
| pMAD-gbaA-f2-for            | TGTAATCATGCGAAAAGATGCACAATTGAAGCGTACAGAAATTA          |
| pMAD-gbaA-rev-Sall:         | CCAGTCGACGCATTGTTACTGCCGATTTAG                        |
| pRB-gbaA-for-BamHI          | TAGGGATCCGAATTTTAAGTAGGTGTAATCATGCGAAAAGATGC AAAAGAGA |
| pRB-gbaA-His-rev-KpnI       | CTCGGTACCTTAGTGATGGTGATGGTGATGGTCATTACGTCCCA CCTCAT   |
| pMAD-gbaB-for-BglII         | CGCAGATCTCAAACCTTTTGGATGAAGAAGGC                      |
| pMAD-gbaB-f1-rev            | TCTCCATCGCCATTAATAAATGTCTGCACTTGCATAGCCTAA            |
| pMAD-gbaB-f2-for            | TTAGGCTATGCAAGTGCAGACATTTAATAATGGCGATGGAGA            |
| pMAD-gbaB-rev-Sall          | CCAGTCGACATCCTAAATCATTGATGCAACG                       |
| pRB-gbaB-for-BamHI          | TAGGGATCCATTTAGATGAGGTGGGACGTA                        |
| pRB-gbaB-rev-KpnI           | CTCGGTACCCTACCAAGGCATCTCTCCAT                         |
| pMAD-SACOL2590-92-for-BglII | CGCAGATCTTTCTTGATAAAATGCGCTTTGG                       |
| pMAD- SACOL2590-92-f1-rev   | GAGAATTTCAATTTAGCAGACCATAAGGTAGATGCTTCGAAATG          |
| pMAD- SACOL2590-92-f2-for   | CATTTCGAAGCATCTACCTTATGGTCTGCTAAAATGAAATTCTC          |
| pMAD- SACOL2590-92-rev-Sall | CCAGTCGACATCAACACTTGATTCTAAGGAG                       |
| Emsa-gbaA-for               | TATCAACACTCTTTTCTTTTATG                               |
| Emsa-gbaA-rev               | TCTTTTGCATCTTTTTCGCATGA                               |
| NB-gbaB-for                 | TCACAGGAGGCAATAAAGGGT                                 |
| NB-gbaB-rev                 | CTAATACGACTCACTATAGGGAGAATTTGTAGCGCCTGGATCAG          |
| NB-SACOL2590-for            | GCAAGATTTAGAAAAGAGCGCA                                |
| NB-SACOL2590-rev            | CTAATACGACTCACTATAGGGAGAACCCTTGGCTTACTGTTGGT          |

Restriction sites are underlined and bold bases indicate point mutations.

## Supplementary References

1. Brückner R, Wagner E, Götz F. Characterization of a sucrase gene from *Staphylococcus xylosus*. *J Bacteriol* 175: 851-7, 1993.
3. Kreiswirth BN, Lofdahl S, Betley MJ, O'Reilly M, Schlievert PM, Bergdoll MS, Novick RP. The toxic shock syndrome exotoxin structural gene is not detectably transmitted by a prophage. *Nature* 305: 709-12, 1983.
4. Pöther DC, Gierok P, Harms M, Mostertz J, Hochgrafe F, Antelmann H, Hamilton CJ, Borovok I, Lalk M, Aharonowitz Y, Hecker M. Distribution and infection-related functions of bacillithiol in *Staphylococcus aureus*. *Int J Med Microbiol* 303: 114-23, 2013.
5. Rosenblum ED, Tyrone S. Serology, density, and morphology of staphylococcal phages. *J Bacteriol* 88: 1737-42, 1964.
6. Shafer WM, landolo JJ. Genetics of staphylococcal enterotoxin B in methicillin-resistant isolates of *Staphylococcus aureus*. *Infect Immun* 25: 902-11, 1979.
7. Studier FW, Moffatt BA. Use of bacteriophage-T7 RNA-polymerase to direct selective high-level expression of cloned genes. *J Mol Biol* 189: 113-130, 1986.
