# Supplementary material for: The two-Cys-type TetR repressor GbaA confers resistance under disulfide and electrophile stress in Staphylococcus aureus
Source: PubMed Central journal article supplement — Free Radic Biol Med. 2021 Dec;177:120–31. doi: 10.1016/j.freeradbiomed.2021.10.024 (PMC8693949; doi:10.1016/j.freeradbiomed.2021.10.024), 2021-12
Supplement: mmc3.pdf [file mmc3.pdf]

# Figure S1

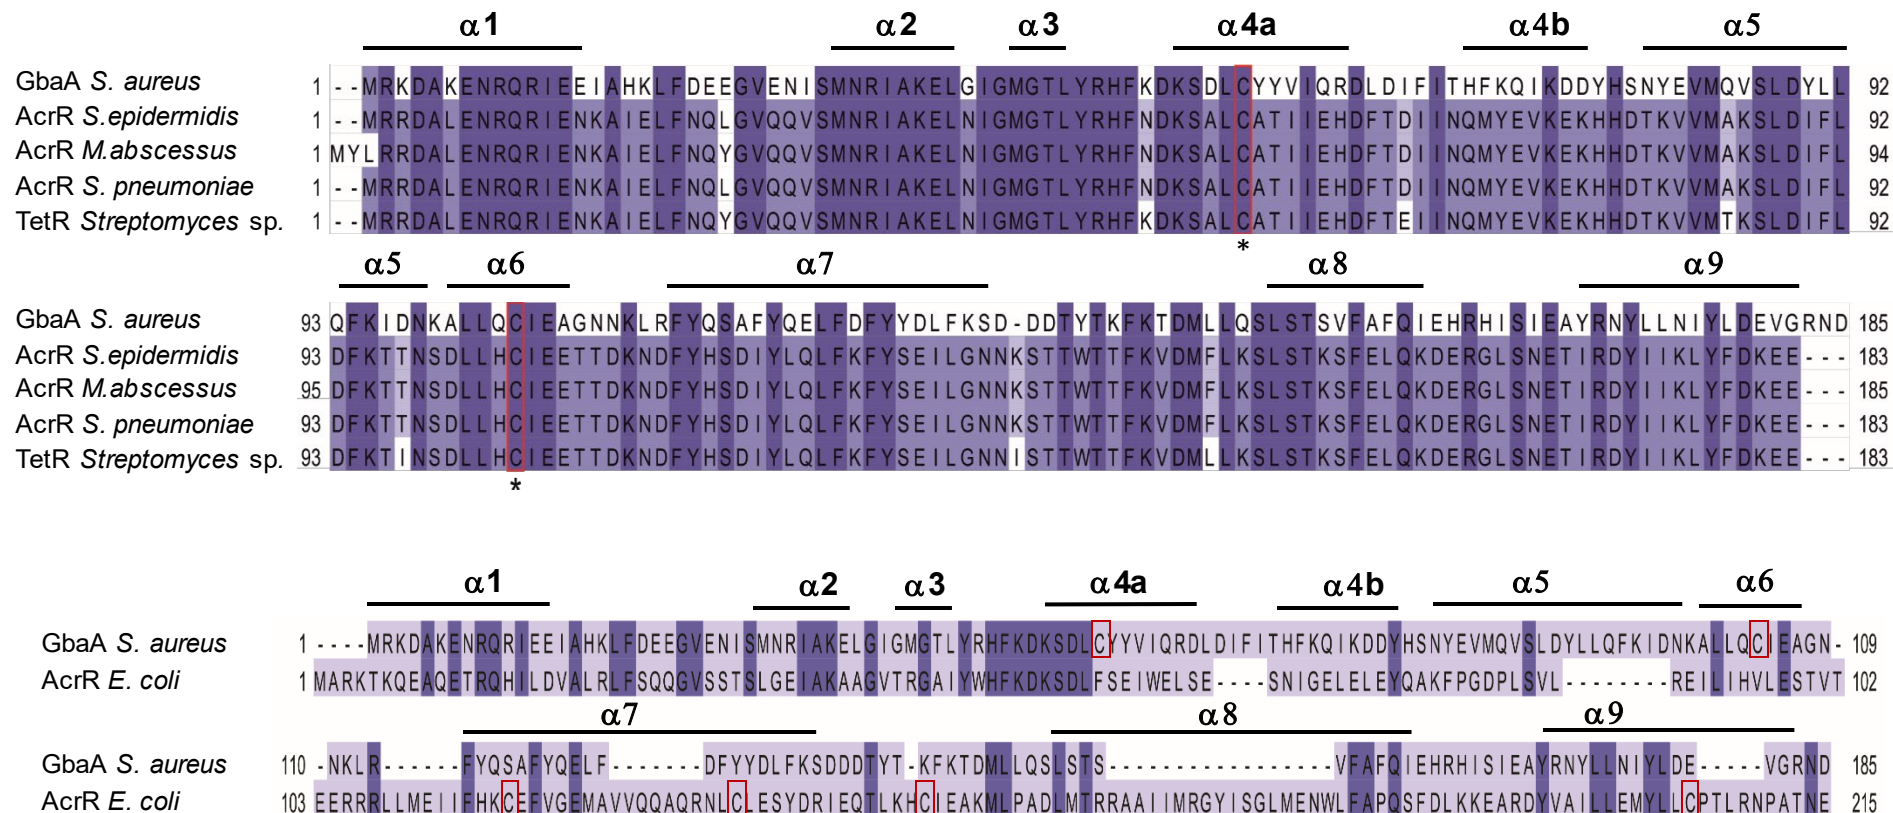

**Figure S1. Multiple protein sequence alignments of GbaA homologs.** GbaA (SACOL2593) of *S. aureus* COL was aligned with AcrR homologs of *Staphylococcus epidermidis* (A0A3S4K8G5, 48.35%), *Mycobacteroides abscessus* (A0A1U0JWP0, 47.8%), *Streptococcus pneumoniae* (A0A0U0EMJ4, 48.35%), TetR of *Streptomyces* sp. WAC00263 (A0A1V1YYR9, 49.4%) and AcrR of *E. coli* (P0ACS9, 27.17%). The protein sequence comparison was performed with Clustal Omega and is presented in Jalview. Intensity of the blue color gradient is based on 50% sequence identity. The conserved Cys55 and Cys104 of GbaA are marked with asterisks (\*).

**Figure S2**

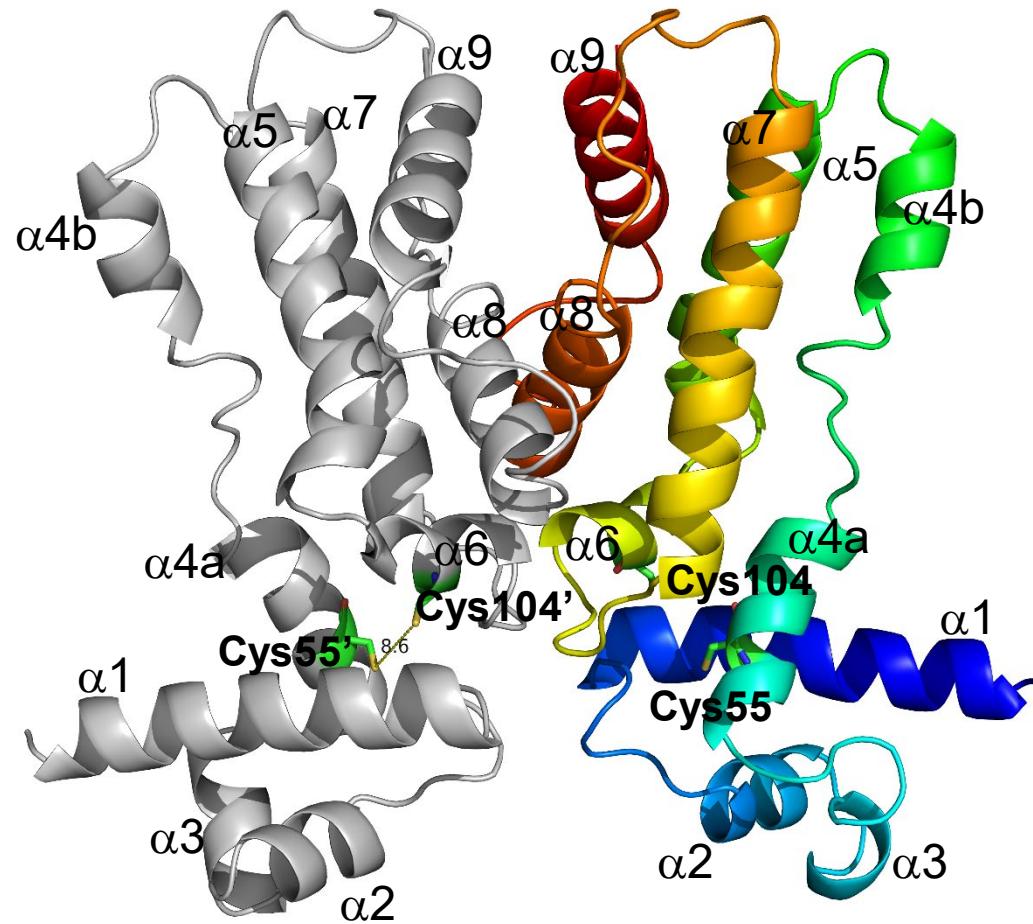

**Figure S2. GbaA structural model.** The structural model of the TetR repressor GbaA was generated with SWISS-MODEL (<https://swissmodel.expasy.org/>) and visualized with PyMol based on the template of *E. coli* AcrR (PDB:3GBC), which showed 27.17 % sequence identity to GbaA. The distance of Cys55 and Cys104 was calculated as ~8.6Å in each subunit. Cys55 and Cys104 are oxidized to intramolecular disulfides under diamide stress in each subunit. The 9  $\alpha$ -helical domains are numbered based on AcrR template (Li et al., J Mol Biol 2007; 374(3): 591–603 <https://www.ncbi.nlm.nih.gov/pmc/articles/PMC2254304/>)

**Figure S3**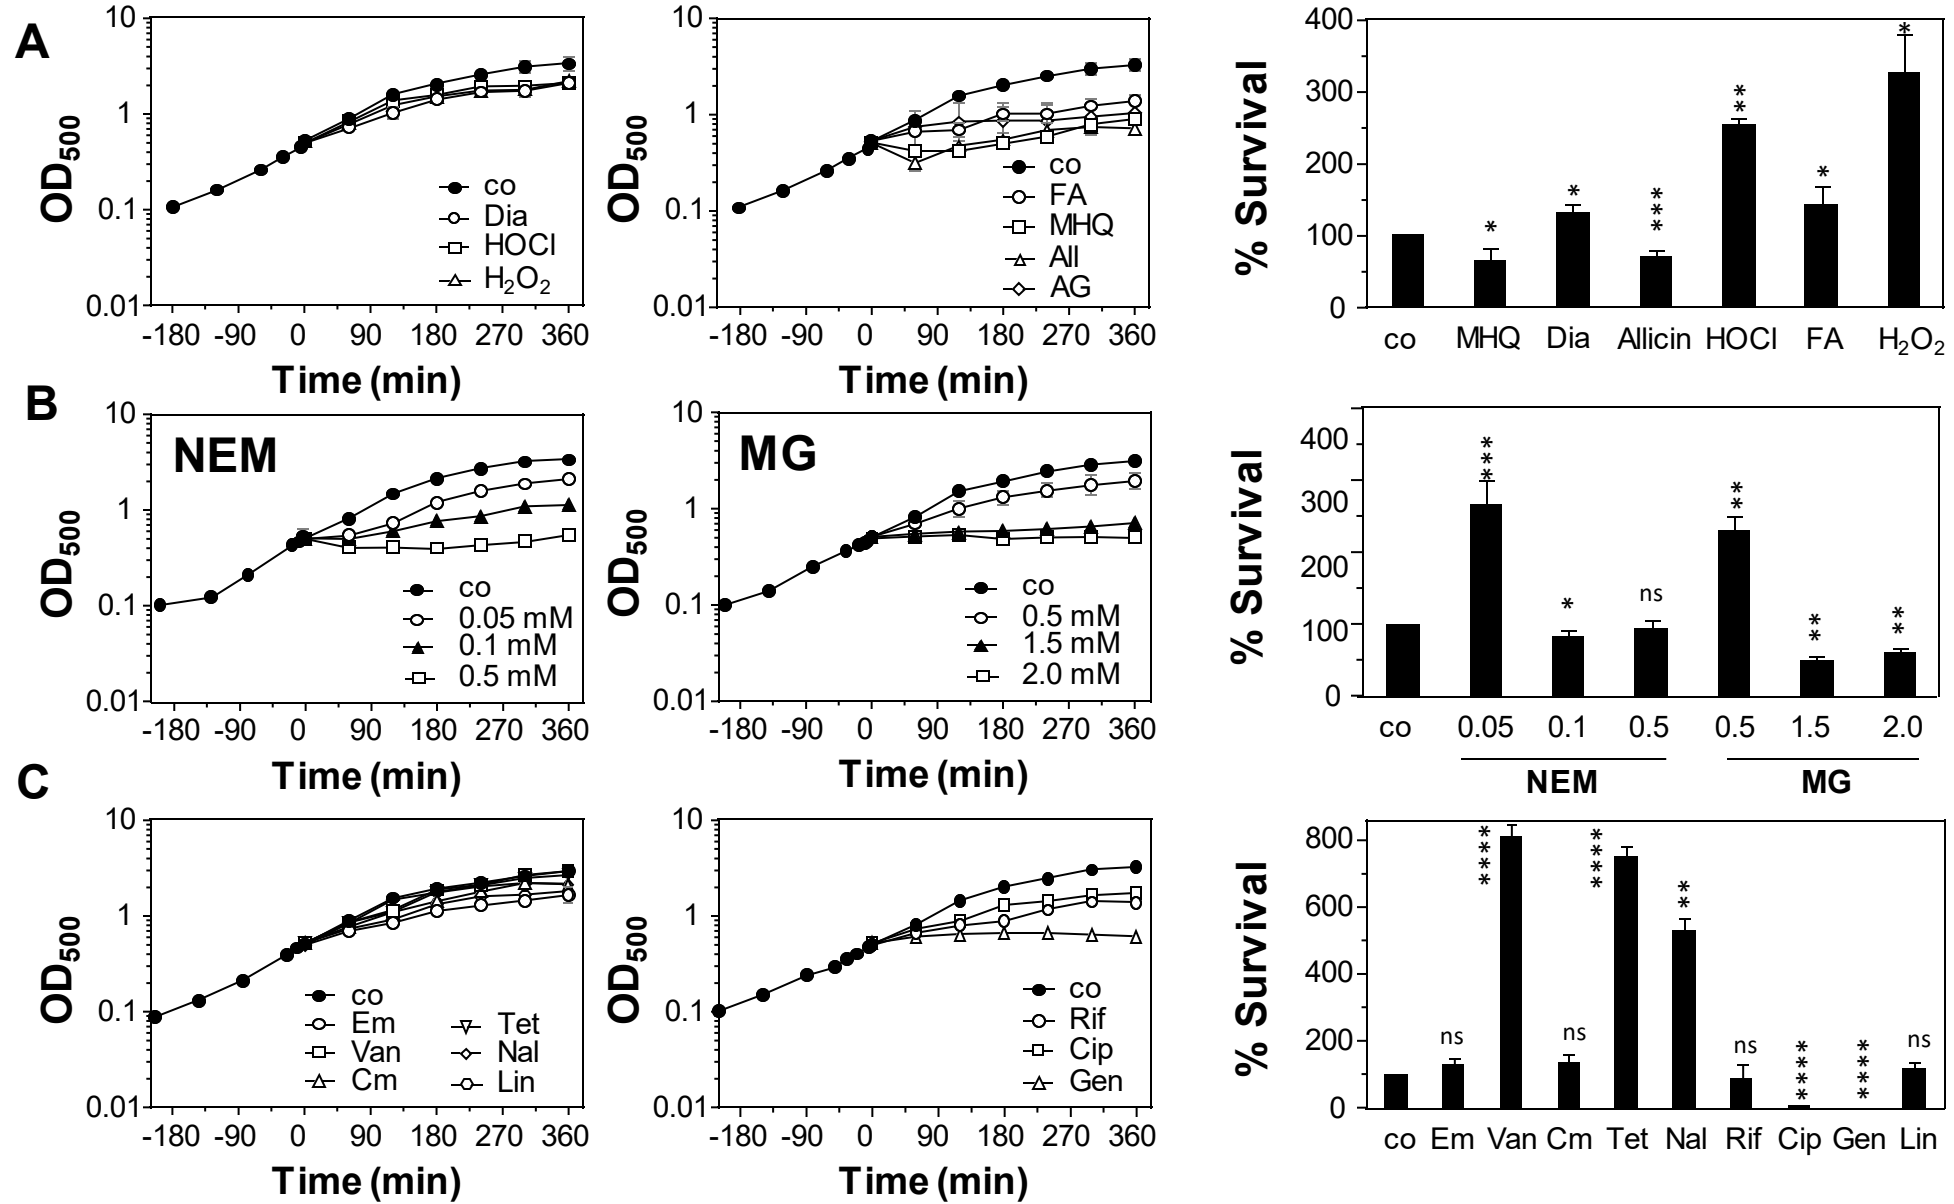

**Figure S3. Growth and survival of *S. aureus* COL after treatment with thiol-reactive compounds (A,B) and antibiotics (C) as applied in Fig. 1A-C.** To monitor the effect of the compounds on the growth and survival of *S. aureus* COL, cells were cultivated in RPMI medium until an OD<sub>500</sub> of 0.5 and subjected to 5 µg/ml AGXX<sup>®</sup>373 (AG), 50 µM methylhydroquinone (MHQ), 2 mM diamide (Dia), 300 µM allicin (All), 1 mM HOCl, 0.75 mM formaldehyde (FA) and 10 mM H<sub>2</sub>O<sub>2</sub> (A), to 0.05 - 0.5 mM NEM and 0.5 - 2 mM MG stress (B) and to antibiotics, such as 0.25 µg/ml erythromycin (Em), 0.5 µg/ml vancomycin (Van), 4 µg/ml chloramphenicol (Cm), 5 µg/ml tetracycline (Tet), 128 µg/ml nalidixic acid (Nal), 0.1 µg/ml rifampicin (Rif), 32 µg/ml ciprofloxacin (Cip), 2 µg/ml gentamicin (Gen) and 2 µg/ml linezolid (Lin) (C). The percentage of bacterial survival after 2 hours of treatment is calculated versus the untreated control and shown at the right in A-C. The results are from 3 biological replicates, error bars represent the standard deviation (SD) and the statistics was calculated using a Student's unpaired two-tailed t-test. The *p*-values were determined at 2h after stress exposure versus the control for growth curves in A-C as follows: *p*=0.0204 Dia, *p*=0.3874 HOCl, *p*=0.0570 H<sub>2</sub>O<sub>2</sub>, *p*=0.0327 FA, *p*=0.0024 MHQ, *p*≤0.0001 All, *p*=0.1216 AGXX, *p*=0.0001-0.0002 NEM, *p*=0.001-0.0001 MG, *p*=0.006 Em, *p*=0.0263 Van, *p*=0.1111 Cm, *p*=0.0087 Tet, *p*=0.8211 Nal, *p*=0.0019 Lin, *p*≤0.0001 Rif, *p*=0.0010 Cip; *p*=0.0005 Gen. Symbols are defined as: ns *p*>0.05; \**p*≤0.05; \*\**p*≤0.01; \*\*\**p*≤0.001 and \*\*\*\**p*≤0.0001.

**Figure S4**

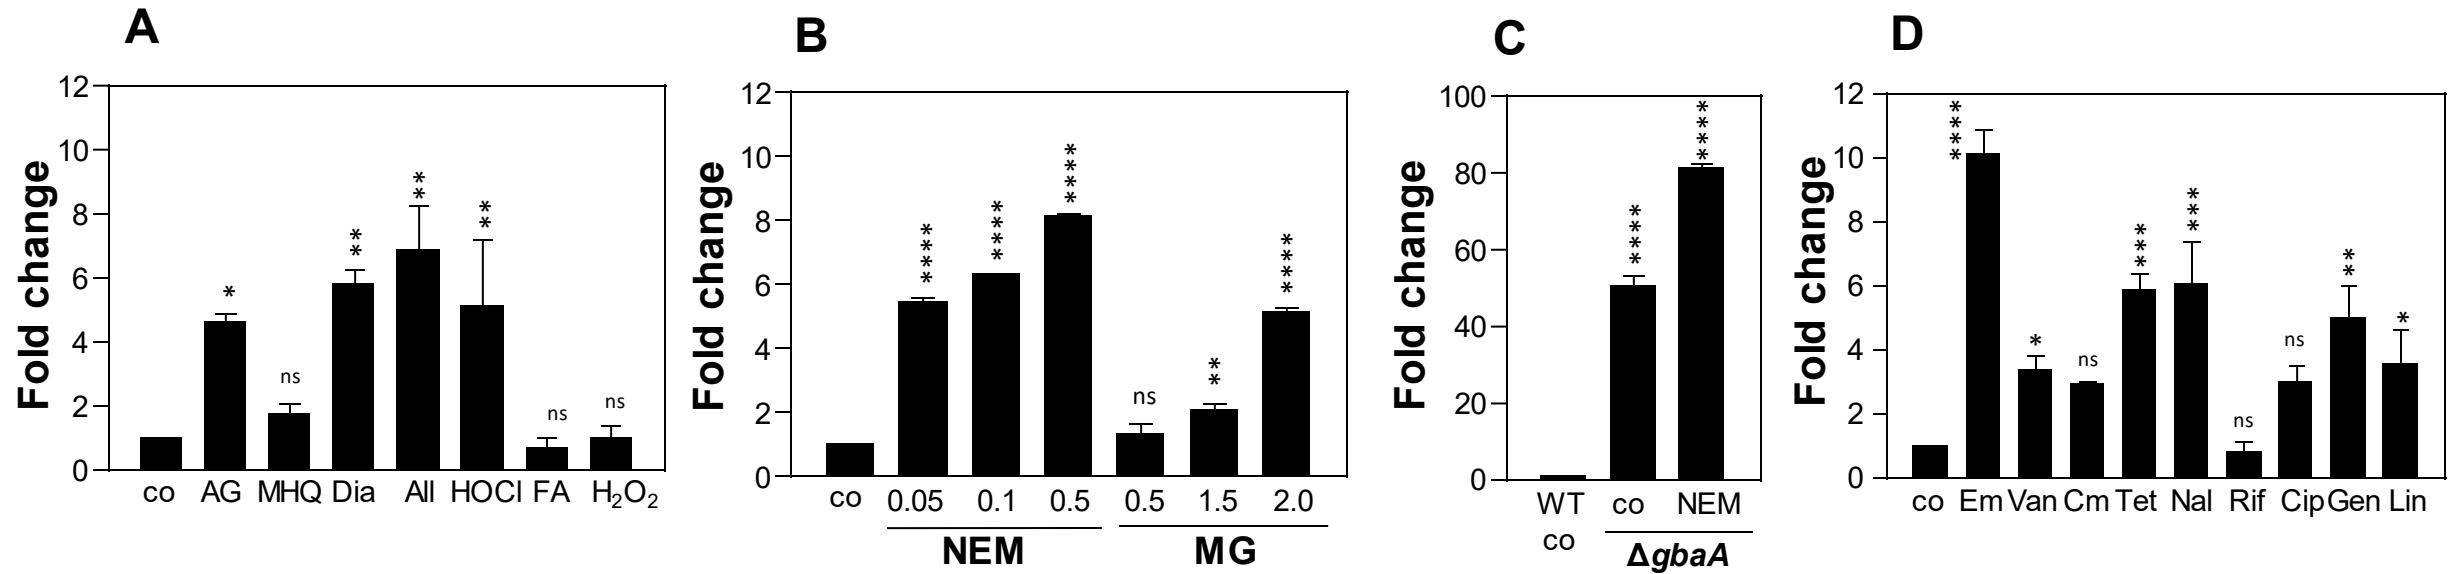

**Figure S4. Quantification of the Northern blot transcripts of the *gbaAB* operon in *S. aureus* WT (A,B,D) and the *gbaA* mutant (C) after exposure to thiol-reactive compounds (A-C) and antibiotics (D) based on the band intensities of Fig. 1A-C.** The *S. aureus* COL WT was subjected to sub-lethal doses of 5 µg/ml AGXX®373 (AG), 50 µM methylhydroquinone (MHQ), 2 mM diamide (Dia), 300 µM allicin (All), 1 mM HOCl, 0.75 mM formaldehyde (FA) and 10 mM H<sub>2</sub>O<sub>2</sub> **A**) or to increasing doses of 0.05-0.5 mM N-ethylmaleimide (NEM) and 0.5-2 mM methylglyoxal (MG) **B**). For comparison of the weak transcriptional induction of the *gbaAB* operon after NEM and MG stress in the WT, the *gbaA* mutant was analyzed under control and NEM stress showing full derepression of the *gbaAB* operon in the control **C**). The Northern blot band intensities were quantified in *S. aureus* COL WT after treatment with sub-lethal doses of antibiotics **D**), including 0.25 µg/ml erythromycin (Em), 0.5 µg/ml vancomycin (Van), 4 µg/ml chloramphenicol (Cm), 5 µg/ml tetracycline (Tet), 128 µg/ml nalidixic acid (Nal), 0.1 µg/ml rifampicin (Rif), 32 µg/ml ciprofloxacin (Cip), 2 µg/ml gentamicin (Gen) and 2 µg/ml linezolid (Lin) in C). Band intensities of the *gbaAB* operon were quantified from 2 biological replicates using ImageJ and error bars represent the standard deviation (SD). The statistics was calculated in comparison to the WT control (co) using ordinary one-way ANOVA and Dunnet's multiple comparisons test using the Graph prism software. Symbols are defined as: ns p>0.05; \*p≤0.05; \*\*p≤0.01; \*\*\*p≤ 0.001 and \*\*\*\*p≤0.0001.

Figure S5

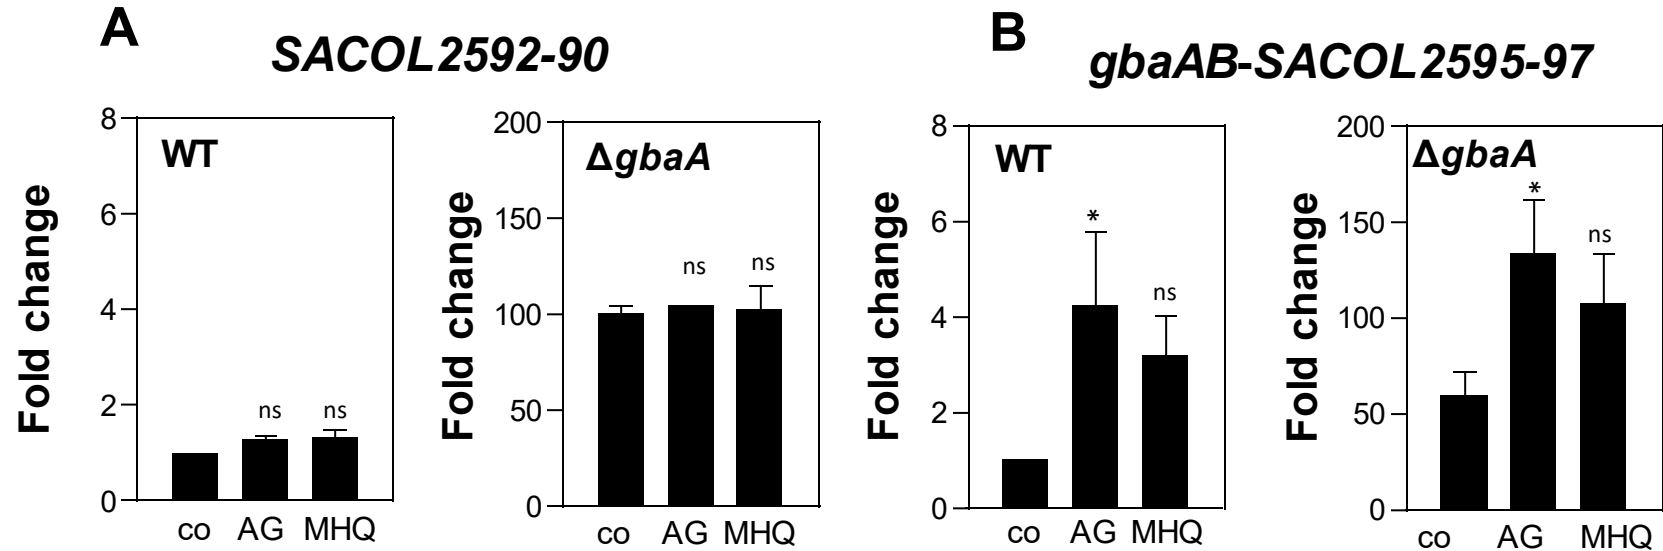

Figure S5. Quantification of the Northern blot transcripts of the *SACOL2592-90* (A) and *gbaAB* operons (B) in *S. aureus* WT and the *gbaA* mutant after AGXX<sup>®</sup> and MHQ stress based on the band intensities of Fig. 2C,D. Band intensities of the Northern blot transcripts were quantified from 2 biological replicates using ImageJ and error bars represent the standard deviation (SD). The statistics of the stress sample was calculated in comparison to the WT and *gbaA* mutant controls (co) using ordinary one-way ANOVA and Dunnet's multiple comparisons test using the Graph prism software. Symbols are defined as: ns  $p > 0.05$ ; \*\*\* $p \leq 0.001$  and \*\*\*\* $p \leq 0.0001$ .

**Figure S6**

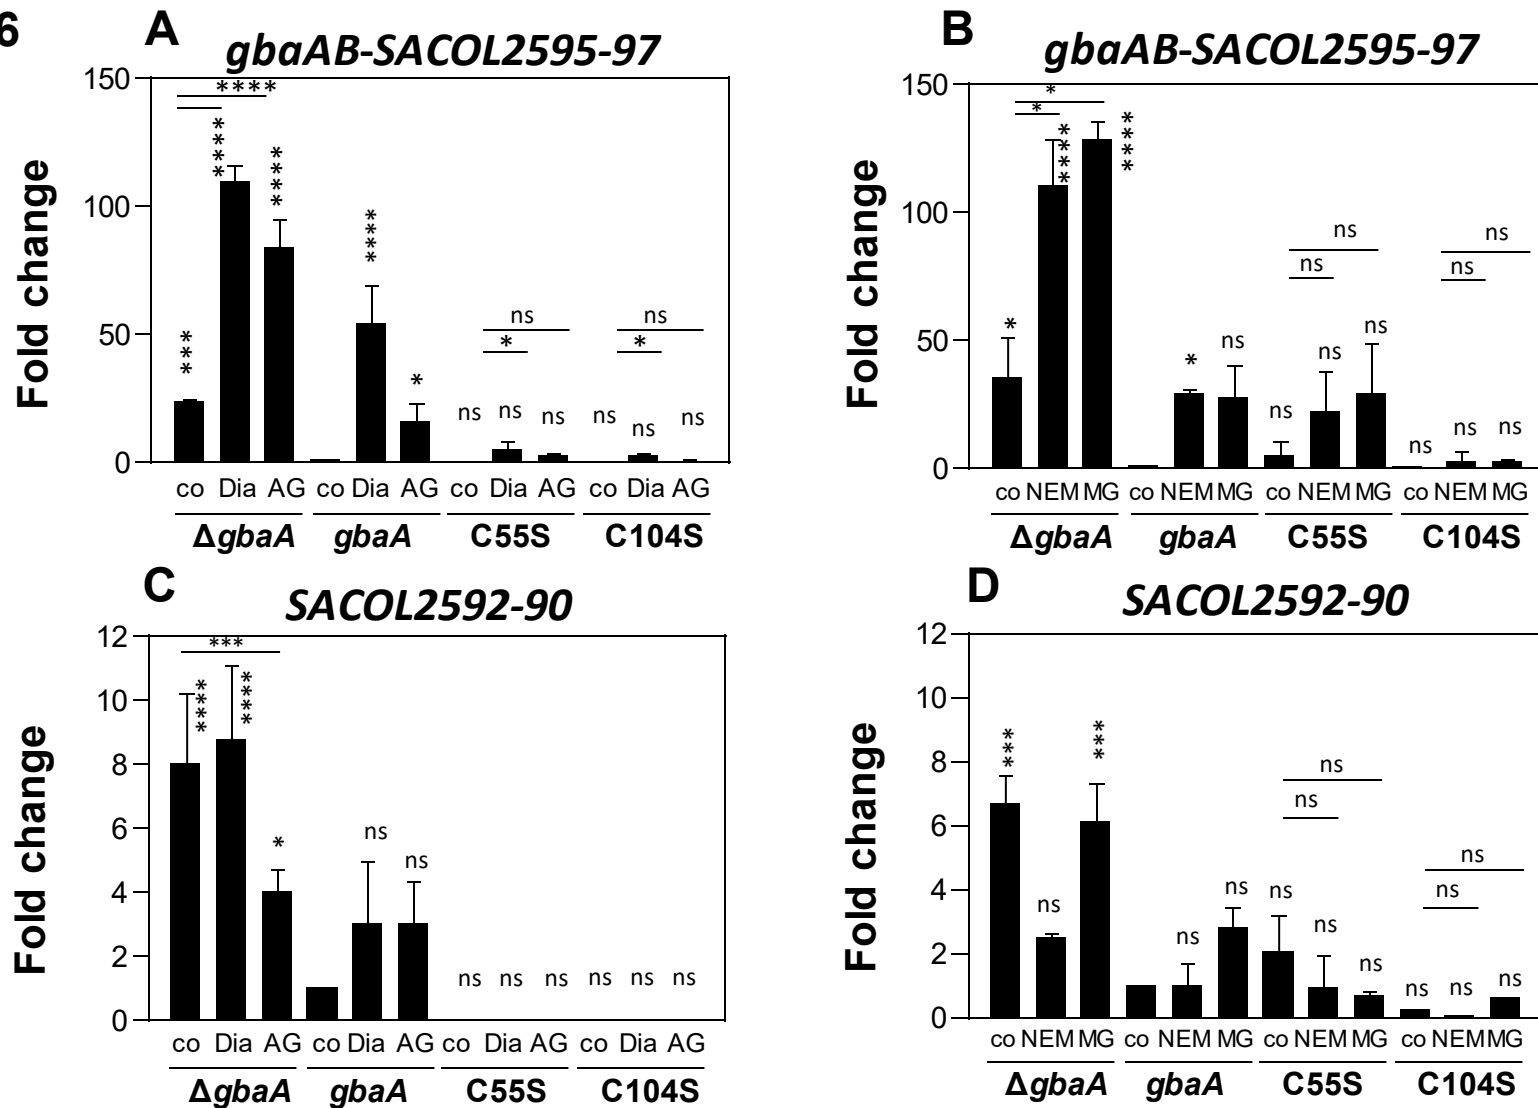

**Figure S6.** Quantification of the Northern blot transcripts of the *gbaAB* operon (A, B) and *SACOL2592-90* operon (C, D) in the *S. aureus* COL  $\Delta gbaA$  mutant and the *gbaA*, *gbaAC55S* and *gbaAC104S* complemented strains after exposure to 2 mM diamide (Dia) and 5  $\mu$ g/ml AGXX<sup>®</sup> (AG) (A,C) as well as 0.3 mM NEM and 2 mM methylglyoxal (MG) stress (B, D) based on the band intensities of Fig. 4A-D. Band intensities of the *gbaAB* and *SACOL2592-90* operons were quantified from 2 biological replicates using ImageJ and error bars represent the standard deviation (SD). The statistics was calculated in comparison to the untreated *gbaA* complemented strain (*gbaA* co) and in stressed samples versus controls using ordinary one-way ANOVA and Dunnet's multiple comparisons test using the Graph prism software. Symbols are defined as: ns  $p > 0.05$ ; \* $p \leq 0.05$ ; \*\* $p \leq 0.01$ ; \*\*\* $p \leq 0.001$  and \*\*\*\* $p \leq 0.0001$ .

**Figure S7****A****GbaA, C55S, C104S MS1 mass range 1200–1400**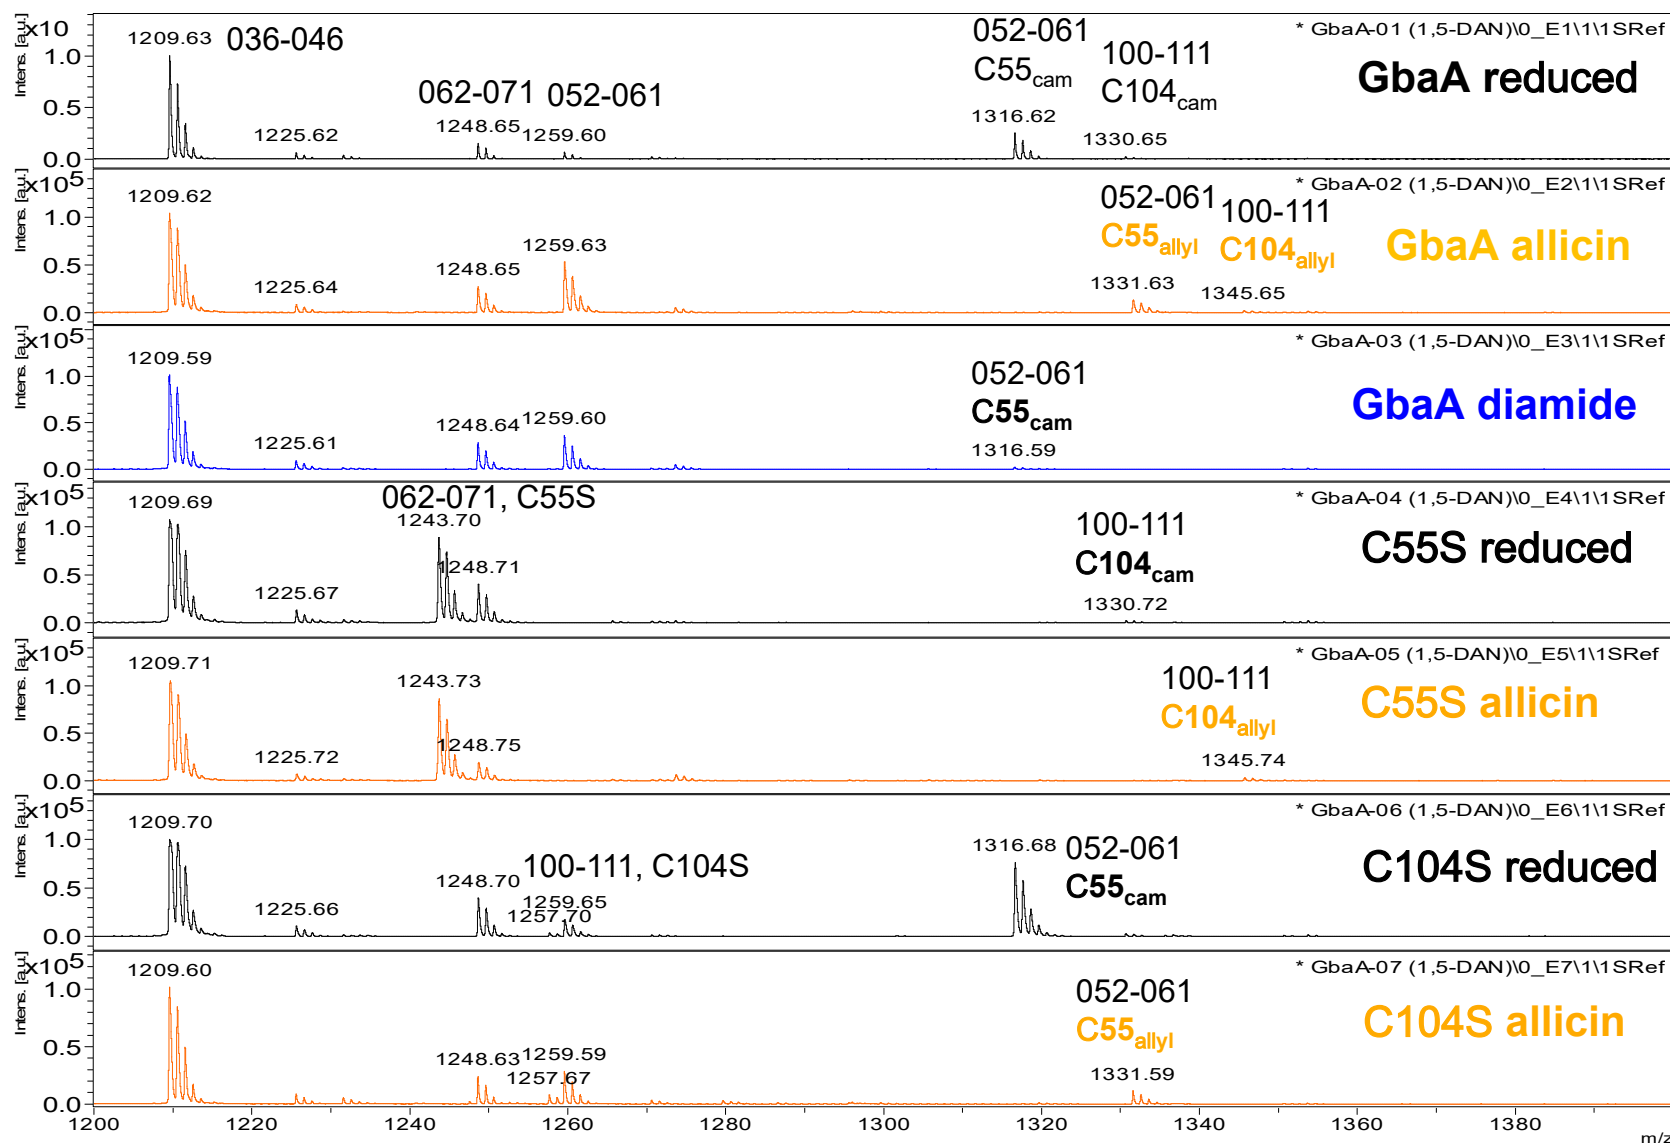

**Figure S7. Identification of disulfides in GbaA, the GbaAC55S and GbaAC104S mutants after diamide and allicin using MALDI-TOF MS *in vitro*.** GbaA proteins were reduced with 10 mM DTT, treated with 1 mM diamide or 1 mM allicin, separated by non-reducing SDS-PAGE, tryptic digested and analyzed using MALDI-TOF-MS. The overview MS1 scan is displayed in the mass ranges m/z= 1200-1400 (**A**), 1310-1350 (**B**) and 2300-2650 (**C**).

**B****GbaA, C55S, C104S MS1 mass range 1310–1350**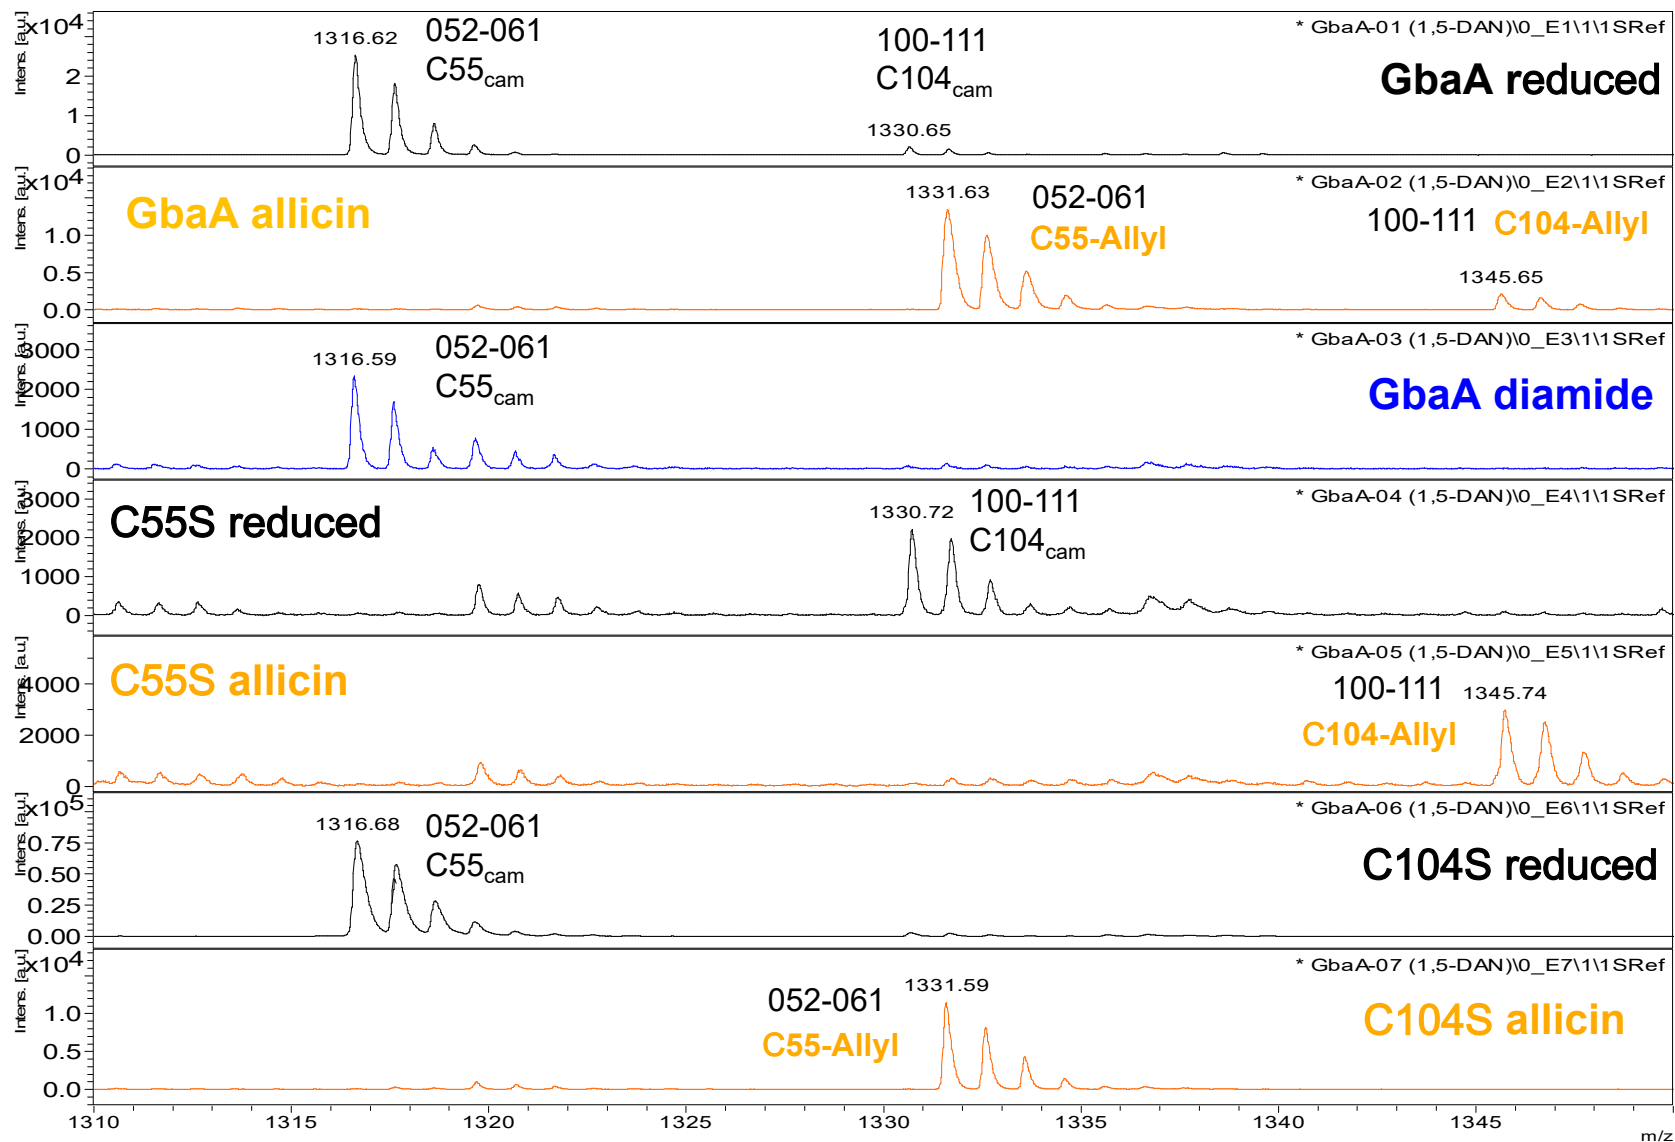



# GbaA, C55S, C104S MS1 mass range 2300–2650 (GbaA intramolecular C55-C104 disulfide)

## C

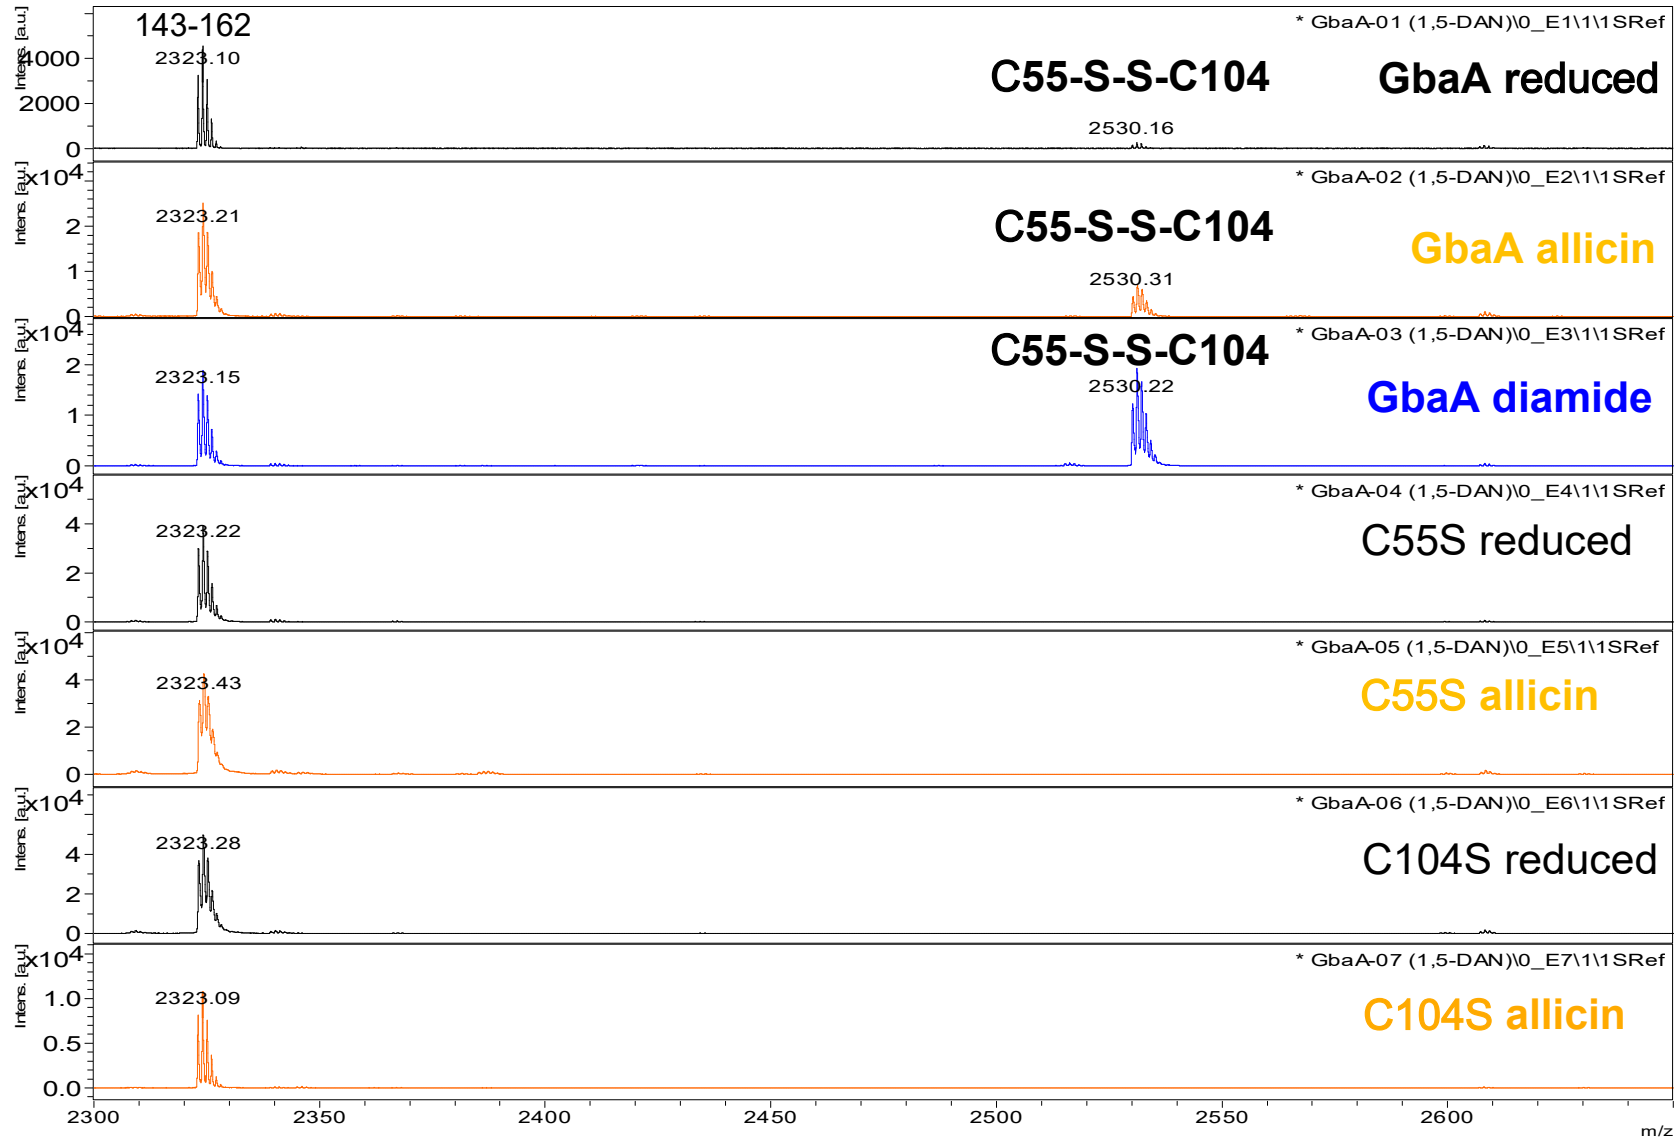

**Figure S8**

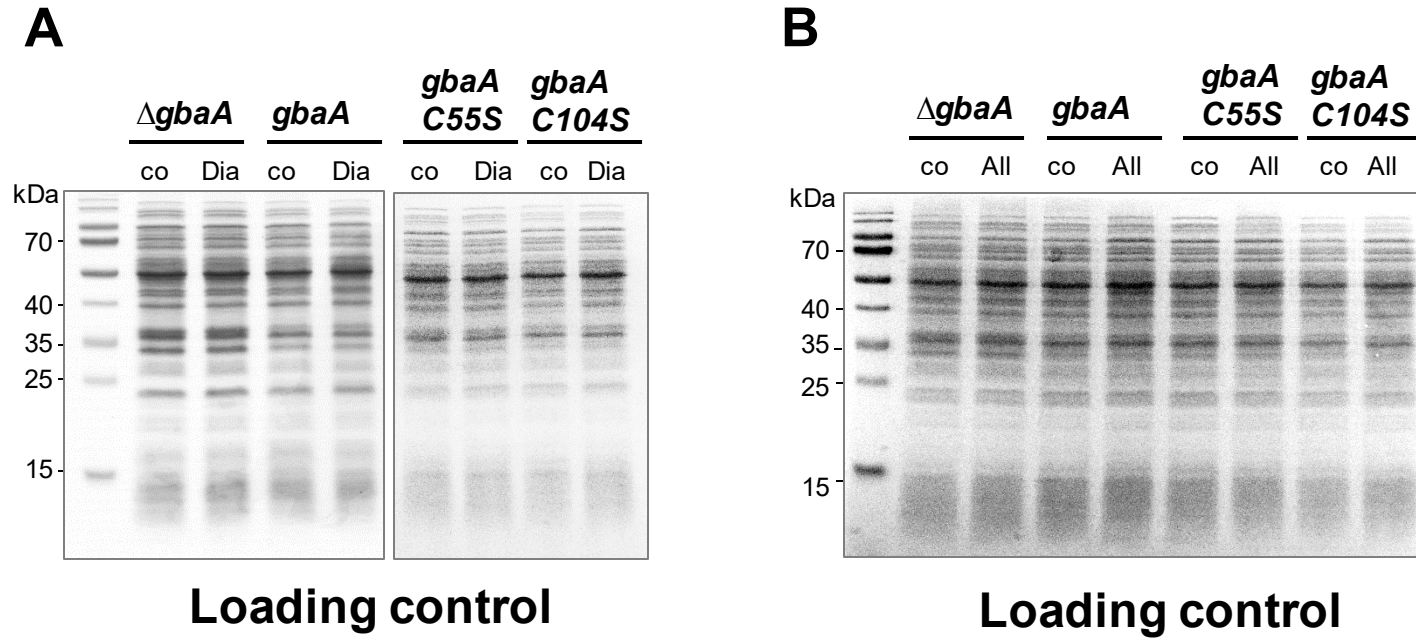

**Figure S8. Loading control of non-reducing SDS-PAGE of protein extracts of the *S. aureus* COL *gbaA* mutant and *gbaA*, *gbaA*C55S and *gbaA*C104S complemented strains after diamide (A) and allicin (B) stress. The same protein extracts used for Western blot analyses in Fig. 6D,E and Fig. 7D,E were separated by non-reducing SDS-PAGE analysis and stained with Coomassie Blue.**

Figure S9

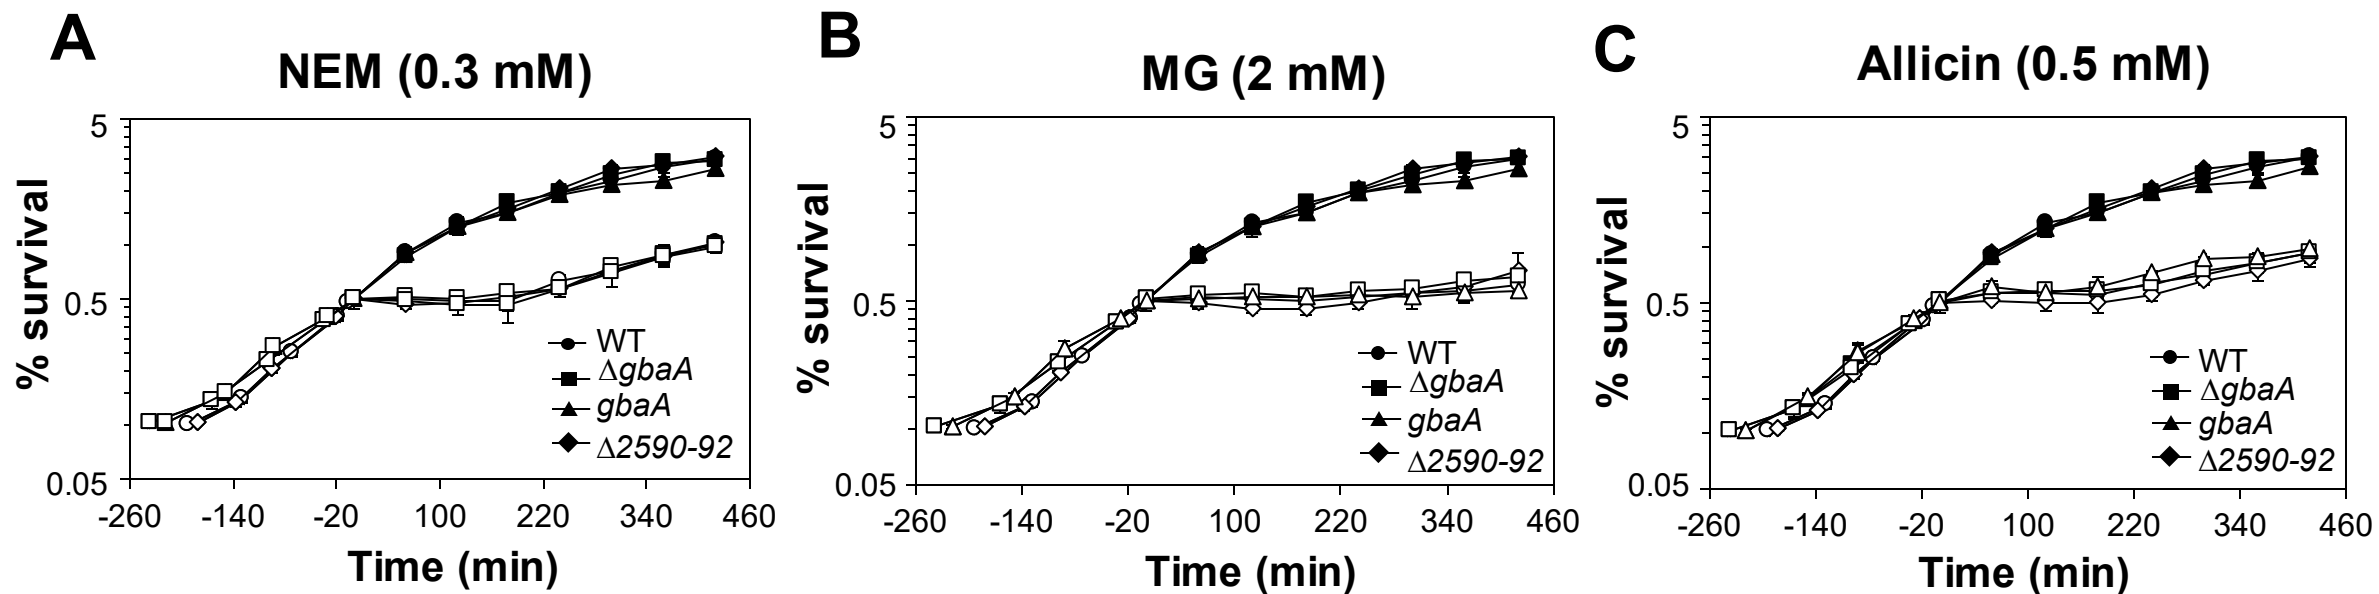

Figure S9. Growth curves of *S. aureus* COL WT, the *gbaA* and *SACOL2590-92* mutants and the *gbaA* complemented strains after exposure to NEM (A), MG (B) and allicin (C). For growth curves, *S. aureus* strains were cultivated in RPMI medium until an  $OD_{500}$  of 0.5 and subjected to 0.3 mM NEM (A), 2 mM MG (B) and 0.5 mM allicin (C). The results are from 4 biological replicates and error bars represent the standard deviation (SD). No significant growth difference was observed for the *gbaA* and *SACOL2590-92* mutants and the *gbaA* complemented strains in comparison to the WT strain.
